# Supplementary material for: Cancer-related Beliefs and Preventive Health Practices among Residents of Rural versus Urban Counties in Alabama
Source: Oxford University Press journal article supplement (doi:10.1158/1940-6207.capr-20-0458), 2021-02-01
Supplement: 19406207capr200458-sup-250800_3_supp_6829204_qmkjpb.docx [file 19406207capr200458-sup-250800_3_supp_6829204_qmkjpb.docx]

Supplemental Table 2. Survey items: Cancer-related beliefs and lifestyle practices

| **Item** | **Anchors** |
| --- | --- |
| *Health Information National Trends Survey (HINTS) Items* | |
| How much do you agree or disagree with each of the following statements?  a. It seems like everything causes cancer.  b. There’s not much you can do to lower your chances of getting cancer.  c. There are so many different recommendations about preventing cancer, it’s hard to know which ones to follow. | 1. Strongly agree, 2) Somewhat agree; 3) Somewhat disagree; 4) Strongly disagree |
| Compared to other people your age, how likely are you to get cancer in your lifetime? | 1. Much less likely; 2) Less likely; 3) About the same; 4) More likely; 5) Much more likely |
| How much do you agree or disagree that cancer is most often caused by a person's behavior or lifestyle? | 1. Strongly agree, 2) Somewhat agree; 3) Somewhat disagree; 4) Strongly disagree |
| Do you think that smoking increases a person's chances of getting cancer? | 1. A lot; 2) A little; 3) Not at all |
| Have you ever smoked at least 100 cigarettes in your entire life? | 1. Yes; 2) No; If yes, Do you now smoke cigarettes? 1) Everyday; 2) Some days; 3) Not at all. |
| Do you think that not getting much exercise increases a person's chances of getting cancer? (a lot, a little, not at all) | 1. A lot; 2) A little; 3) Not at all |
| In a typical week, how many days do you do any physical activity or exercise of at least moderate intensity, such as brisk walking, bicycling at a regular pace, swimming at a regular pace, and heavy gardening?  On the days that you do any physical activity or exercise of at least moderate intensity, how long are you typically doing these activities? | __ days/week  __ __ __ minutes/day  (days/week multiplied by average # of minutes/session) |
| Overall, how confident are you that you could get advice or information about health or medical topics if you needed it? | 1. Completely confident; 2) Very confident; 3) Somewhat confident; 4) A little confident; 5) Not confident at all |
| *Behavioral Risk Factor Surveillance System (BRFSS) Items* | |
| Do you currently use chewing tobacco, snuff or Snus? | 1. Everyday; 2) Some days; 3) Not at all |
| Do you currently use E cigarettes? | 1. Everyday; 2) Some days; 3) Not at all |
| During the past 30 days, how often did your drink regular soda that contains sugar? | Times/day, week, or month |
| (After asking for body weight ) Right now, do you feel you are...? | 1. Overweight; 2) Slightly overweight; 3) Underweight; 4) Slightly underweight; 5) Just about the right weight |
