# Supplementary material for: Cancer-related Beliefs and Preventive Health Practices among Residents of Rural versus Urban Counties in Alabama
Source: Oxford University Press journal article supplement (doi:10.1158/1940-6207.capr-20-0458), 2021-02-01
Supplement: 19406207capr200458-sup-250800_3_supp_6829205_qmkjpb.docx [file 19406207capr200458-sup-250800_3_supp_6829205_qmkjpb.docx]

Supplemental Table 1. Survey items: Socio-demographic and health status variables

| **Item** | **Anchors** |
| --- | --- |
| *Health Information National Trends Survey (HINTS) Items* | |
| What is your age? | __ __ __ years |
| Are you male or female? | 1. Male; 2) Female |
| What is your race? | Mark all that apply: 1) White; 2) Black or African American; 3) American Indian or Alaska Native Asian Indian; 4) Chinese; 5) Filipino; 6) Japanese; 7) Korean; 8) Vietnamese; 9) Other Asian; 10) Native Hawaiian; 11) Guamanian or Chamorro Samoan; 12) Other Pacific Islander |
| Are you Hispanic, Latino/a, or Spanish origin? | Mark all that apply: 1) Mexican; 2) Mexican American; 3) Chicano/a Puerto Rican; 4) Cuban; 5) Another Hispanic, Latino/a, or Spanish origin; 6) None of these |
| What is your marital status? | 1. Married; 2) Living as married; 3) Divorced; 4) Widowed; 5) Separated; 6) Single, never been married |
| What is the highest grade or level of schooling you completed? | 1. Less than 8 years; 2) 8 through 11 years; 3) 12 years or completed high school; 4) Post high school training other than college (vocational or technical); 5) Some college; 6) College graduate; 7) Postgraduate |
| What is your current occupational status? | 1. Employed; 2) Unemployed; 3) Homemaker; 4) Student; 5) Retired; 6) Disabled; 7) Other (Specify)________________ |
| Do you ever go on-line to access the Internet or World Wide Web, or to send and receive e-mail? | 1. Yes; 2) No |
| Thinking about members of your family living in this household, what is your combined annual income, meaning the total pre-tax income from all sources earned in the past year? | 1. $0 to $9,999; 2) $10,000 to $14,999; 3) $15,000 to $19,999; 4) $20,000 to $34,999; 5) $35,000 to $49,999; 6) $50,000 to $74,999; 7) $75,000 to $99,999; 8) $100,000 to $199,999; $200,000 or more |
| Which one of these comes closest to your own feelings about your household’s income these days? | 1. Living comfortably on present income; 2) Getting by on present income; 3) Finding it difﬁcult on present income; 4) Finding it very difﬁcult on present income. |
| Do you currently rent or own your home? | 1. Own; 2) Rent; 3) Occupied without paying monetary rent |
| *National Health Interview Survey Items* | |
| Have you ever been told by a doctor or a health professional that you had cancer? | 1. Yes; 2) No |
